# Supplementary material for: Discrimination of multilocus sequence typing-based Campylobacter jejuni subgroups by MALDI-TOF mass spectrometry
Source: BMC Microbiol. 2013 Nov 7;13:247. doi: 10.1186/1471-2180-13-247 (PMC4228279; doi:10.1186/1471-2180-13-247)
Supplement: Additional file 1: Table S1 — Marker gene profile of 104 C. jejuni isolates given in the order of the ICMS-based PCA-dendrogram. Presence of a given marker gene is indicated in orange, absence is indicated in green. The group assignment in the last column is taken from a previous study [18]. [file 1471-2180-13-247-S1.pdf]

**Supplementary Table 1: Marker gene profile of 104 *C. jejuni* isolates in order of the ICMS-based PCA-dendrogram**

[illegible]
