# Supplementary material for: Discrimination of multilocus sequence typing-based Campylobacter jejuni subgroups by MALDI-TOF mass spectrometry
Source: BMC Microbiol. 2013 Nov 7;13:247. doi: 10.1186/1471-2180-13-247 (PMC4228279; doi:10.1186/1471-2180-13-247)
Supplement: Additional file 2: Table S2 — Marker gene profile of 104 C. jejuni isolates given in the order of the MLST-based UPGMA-tree. Presence of a given marker gene presence is indicated in orange, absence is indicated in green. The group assignment in the last column is taken from a previous study [18]. [file 1471-2180-13-247-S2.pdf]

**Supplementary Table 2: Marker gene profile of 104 *C. jejuni* isolates in order of the MLST-based UPGMA-tree**

| Isolat  | origin  | MLST-ST | MLST-CC | cj1365c | cj1585c | dtlp7 | dmsA | ansB | ggt | cj1321-6 | Fucose | cj0178 | cj0755 | cstII | cstIII | group |
|---------|---------|---------|---------|---------|---------|-------|------|------|-----|----------|--------|--------|--------|-------|--------|-------|
| BFR3865 | human   | 53      | 21      |         |         |       |      |      |     |          |        |        |        |       |        | 1A    |
| BFR3876 | human   | 53      | 21      |         |         |       |      |      |     |          |        |        |        |       |        | 1A    |
| BFR3881 | human   | 53      | 21      |         |         |       |      |      |     |          |        |        |        |       |        | 1A    |
| BFR3866 | human   | 53      | 21      |         |         |       |      |      |     |          |        |        |        |       |        | 1A    |
| bovC567 | cow     | 21      | 21      |         |         |       |      |      |     |          |        |        |        |       |        | 1A    |
| bov79   | cow     | 21      | 21      |         |         |       |      |      |     |          |        |        |        |       |        | 1A    |
| bovC536 | cow     | 21      | 21      |         |         |       |      |      |     |          |        |        |        |       |        | 1A    |
| bovC404 | cow     | 21      | 21      |         |         |       |      |      |     |          |        |        |        |       | 1A     |       |
| av7252  | chicken | 50      | 21      |         |         |       |      |      |     |          |        |        |        |       |        | 1B    |
| av7278  | chicken | 50      | 21      |         |         |       |      |      |     |          |        |        |        |       |        | 1B    |
| av7297  | chicken | 50      | 21      |         |         |       |      |      |     |          |        |        |        |       |        | 1B    |
| meC340  | turkey  | 50      | 21      |         |         |       |      |      |     |          |        |        |        |       |        | 1B    |
| av7292  | chicken | 50      | 21      |         |         |       |      |      |     |          |        |        |        |       |        | 1B    |
| BFR3922 | chicken | 46      | 206     |         |         |       |      |      |     |          |        |        |        |       |        | 1B    |
| BFR3926 | chicken | 46      | 206     |         |         |       |      |      |     |          |        |        |        |       |        | 1B    |
| BFR3951 | chicken | 46      | 206     |         |         |       |      |      |     |          |        |        |        |       |        | 1B    |
| bovC246 | cow     | 48      | 48      |         |         |       |      |      |     |          |        |        |        |       |        | 1B    |
| BFR3885 | cow     | 48      | 48      |         |         |       |      |      |     |          |        |        |        |       |        | 1B    |
| av7073  | chicken | 48      | 48      |         |         |       |      |      |     |          |        |        |        |       |        | 1B    |
| bovC539 | cow     | 38      | 48      |         |         |       |      |      |     |          |        |        |        |       |        | 1B    |
| bovC405 | cow     | 38      | 48      |         |         |       |      |      |     |          |        |        |        |       |        | 1B    |
| av0097  | chicken | 122     | 206     |         |         |       |      |      |     |          |        |        |        |       |        | 1B    |
| huA35   | human   | 122     | 206     |         |         |       |      |      |     |          |        |        |        |       |        | 1B    |
| huA28   | human   | 122     | 206     | 1B      |         |       |      |      |     |          |        |        |        |       |        |       |
| huA13   | human   | 3188    | 206     | 1B      |         |       |      |      |     |          |        |        |        |       |        |       |
| huA34   | human   | 572     | 206     | 1B      |         |       |      |      |     |          |        |        |        |       |        |       |
| bov159  | cow     | 572     | 206     | 1B      |         |       |      |      |     |          |        |        |        |       |        |       |
| huA26   | human   | 572     | 206     | 1B      |         |       |      |      |     |          |        |        |        |       |        |       |
| av7060  | chicken | 572     | 206     |         |         |       |      |      |     |          |        |        |        |       | 1B     |       |
| huB6    | human   | 4631    | 446     |         |         |       |      |      |     |          |        |        |        |       |        | 1B    |
| av4116  | chicken | 450     | 446     |         |         |       |      |      |     |          |        |        |        |       |        | 1B    |
| huE12   | human   | 450     | 446     |         |         |       |      |      |     |          |        |        |        |       |        | 1B    |
| meC0282 | turkey  | 450     | 446     |         |         |       |      |      |     |          |        |        |        |       |        | 1B    |
| huA6    | human   | 4587    | 49      |         |         |       |      |      |     |          |        |        |        |       |        | 1B    |
| huA33   | human   | 4590    | 49      |         |         |       |      |      |     |          |        |        |        |       |        | 1B    |
| huB12   | human   | 257     | 257     |         |         |       |      |      |     |          |        |        |        |       |        | 6     |
| huE2    | human   | 49      | 49      |         |         |       |      |      |     |          |        |        |        |       |        | 1B    |
| BFR3948 | chicken | 49      | 49      | 1B      |         |       |      |      |     |          |        |        |        |       |        |       |
| huA23   | human   | 267     | 283     |         |         |       |      |      |     |          |        |        |        |       |        | 2B    |
| BFR3907 | human   | 267     | 283     |         |         |       |      |      |     |          |        |        |        |       |        | 2B    |
| huC8    | human   | 383     | 283     |         |         |       |      |      |     |          |        |        |        |       |        | 2B    |
| BFR3950 | chicken | 564     | 283     |         |         |       |      |      |     |          |        |        |        |       |        | 2B    |
| BFR3868 | human   | 45      | 45      |         |         |       |      |      |     |          |        |        |        |       |        | 2B    |
| BFR3880 | human   | 45      | 45      |         |         |       |      |      |     |          |        |        |        |       |        | 2B    |
| BFR3867 | human   | 45      | 45      |         |         |       |      |      |     |          |        |        |        |       |        | 2B    |
| BFR3895 | human   | 45      | 45      |         |         |       |      |      |     |          |        |        |        |       |        | 2B    |
| BFR3929 | cow     | 45      | 45      | 2B      |         |       |      |      |     |          |        |        |        |       |        |       |
| av7107  | chicken | 42      | 42      |         |         |       |      |      |     |          |        |        |        |       |        | 2A    |
| bovC537 | cow     | 42      | 42      |         |         |       |      |      |     |          |        |        |        |       |        | 2A    |
| BFR3918 | human   | 42      | 42      |         |         |       |      |      |     |          |        |        |        |       |        | 2A    |
| bovC084 | cow     | 4670    | 42      |         |         |       |      |      |     |          |        |        |        |       |        | 2A    |
| 81-176  | human   | 913     | 42      |         |         |       |      |      |     |          |        |        |        |       |        | 2A    |
| meC0280 | turkey  | 828     | 828     |         |         |       |      |      |     |          |        |        |        |       |        | 3A    |
| meC0281 | turkey  | 828     | 828     |         |         |       |      |      |     |          |        |        |        |       |        | 3A    |
| meC467  | turkey  | 828     | 828     |         |         |       |      |      |     |          |        |        |        |       |        | 3A    |
| huB20   | human   | 4637    | 52      |         |         |       |      |      |     |          |        |        |        |       |        | 3A    |
| huC25   | human   | 775     | 52      |         |         |       |      |      |     |          |        |        |        |       |        | 3A    |
| huA22   | human   | 4630    | 52      |         |         |       |      |      |     |          |        |        |        |       |        | 3A    |
| meC283  | turkey  | 443     | 443     |         |         |       |      |      |     |          |        |        |        |       |        | 3A    |
| huC20   | human   | 51      | 443     |         |         |       |      |      |     |          |        |        |        |       |        | 3A    |
| huC24   | human   | 51      | 443     |         |         |       |      |      |     |          |        |        |        |       | 3A     |       |
| huE19   | human   | 22      | 22      |         |         |       |      |      |     |          |        |        |        |       |        | 2A    |
| av5020  | chicken | 22      | 22      |         |         |       |      |      |     |          |        |        |        |       |        | 2A    |
| bovC117 | cow     | 22      | 22      |         |         |       |      |      |     |          |        |        |        |       |        | 2A    |
| BFR1764 | human   | 22      | 22      |         |         |       |      |      |     |          |        |        |        |       |        | 2A    |
| av5018  | chicken | 22      | 22      |         |         |       |      |      |     |          |        |        |        |       |        | 2A    |
| HS7     | chicken | 353     | 353     |         |         |       |      |      |     |          |        |        |        |       |        | 3A    |
| HS9     | chicken | 353     | 353     |         |         |       |      |      |     |          |        |        |        |       |        | 3A    |
| av7126  | chicken | 353     | 353     |         |         |       |      |      |     |          |        |        |        |       |        | 3A    |
| HS3     | chicken | 4656    | 353     |         |         |       |      |      |     |          |        |        |        |       |        | 3A    |
| HS8     | chicken | 4658    | 353     |         |         |       |      |      |     |          |        |        |        |       |        | 3A    |
| huA9    | human   | 354     | 354     |         |         |       |      |      |     |          |        |        |        |       |        | 3A    |
| huB16   | human   | 354     | 354     |         |         |       |      |      |     |          |        |        |        |       |        | 3A    |
| av7270  | chicken | 2288    | 354     |         |         |       |      |      |     |          |        |        |        |       |        | 3A    |
| meC130  | turkey  | 2288    | 354     |         |         |       |      |      |     |          |        |        |        |       |        | 3A    |
| HW3     | chicken | 464     | none    |         |         |       |      |      |     |          |        |        |        |       |        | 3A    |
| HW2     | chicken | 464     | none    |         |         |       |      |      |     |          |        |        |        |       |        | 3A    |
| HW7     | chicken | 464     | none    |         |         |       |      |      |     |          |        |        |        |       |        | 3A    |
| me680   | turkey  | 464     | none    |         |         |       |      |      |     |          |        |        |        |       |        | 3A    |
| HW4     | chicken | 464     | none    |         |         |       |      |      |     |          |        |        |        |       |        | 3A    |
| huA29   | human   | 658     | 658     |         |         |       |      |      |     |          |        |        |        |       |        | 3A    |
| huC07   | human   | 4643    | 658     | 3A      |         |       |      |      |     |          |        |        |        |       |        |       |
| HS5     | chicken | 1900    | 658     |         |         |       |      |      |     |          |        |        |        |       | 3A     |       |
| bov277  | cow     | 352     | 61      |         |         |       |      |      |     |          |        |        |        |       |        | 3B    |
| BFR3889 | cow     | 61      | 61      |         |         |       |      |      |     |          |        |        |        |       |        | 3B    |
| BFR3912 | cow     | 61      | 61      |         |         |       |      |      |     |          |        |        |        |       |        | 3B    |
| BFR3043 | human   | 60      | 61      |         |         |       |      |      |     |          |        |        |        |       |        | 3B    |
| BFR3943 | human   | 60      | 61      |         |         |       |      |      |     |          |        |        |        |       |        | 3B    |
| BFR3947 | human   | 60      | 61      | 3B      |         |       |      |      |     |          |        |        |        |       |        |       |
| HS10    | chicken | 877     | none    |         |         |       |      |      |     |          |        |        |        |       |        | 5     |
| HS16    | chicken | 4659    | none    |         |         |       |      |      |     |          |        |        |        |       |        | 5     |
| HS01    | chicken | 877     | none    |         |         |       |      |      |     |          |        |        |        |       |        | 5     |
| huE11   | human   | 4651    | none    |         |         |       |      |      |     |          |        |        |        |       |        | 5     |
| huC22   | human   | 584     | 257     |         |         |       |      |      |     |          |        |        |        |       |        | 6     |
| huE15   | human   | 4571    | 257     |         |         |       |      |      |     |          |        |        |        |       |        | 6     |
| huE23   | human   | 257     | 257     |         |         |       |      |      |     |          |        |        |        |       |        | 6     |
| huB11   | human   | 257     | 257     |         |         |       |      |      |     |          |        |        |        |       |        | 6     |
| huB13   | human   | 257     | 257     |         |         |       |      |      |     |          |        |        |        |       |        | 6     |
| meC0475 | turkey  | 257     | 257     |         |         |       |      |      |     |          |        |        |        |       |        | 6     |
| huA4    | human   | 4626    | 1034    |         |         |       |      |      |     |          |        |        |        |       |        | 4     |
| huE22   | human   | 696     | 1332    |         |         |       |      |      |     |          |        |        |        |       |        | 4     |
| meC1496 | turkey  | 4674    | 1034    |         |         |       |      |      |     |          |        |        |        |       |        | 4     |
| av509   | chicken | 977     | 1034    |         |         |       |      |      |     |          |        |        |        |       |        | 4     |
| meC816  | turkey  | 1709    | 1034    |         |         |       |      |      |     |          |        |        |        |       |        | 4     |
